# Supplementary material
Source: publisher figshare collection journal article supplement (https://acs.figshare.com/ndownloader/files/3960070)
Supplement: Supplementary file 1 [file 3960070]

## Supporting Information

### Cyclic Tungstoselenites Based on {Se<sub>2</sub>W<sub>12</sub>} Units

*Irina V. Kalinina,<sup>\*,§</sup> Eugenia V. Peresypkina,<sup>§</sup> Natalya V. Izarova,<sup>†</sup> Fiona M. Nkala,<sup>†</sup> Ulrich Kortz,<sup>\*,†</sup> Nikolay B. Kompankov,<sup>§</sup> Nikolay K. Moroz,<sup>§</sup> and Maxim N. Sokolov<sup>§#</sup>*

*<sup>§</sup> Nikolaev Institute of Inorganic Chemistry, Prospekt Lavrentyeva 3, 630090 Novosibirsk, Russia*

*# Novosibirsk State University, ul. Pirogova 2, 630090, Novosibirsk, Russia*

*<sup>†</sup> Jacobs University, School of Engineering and Science, P. O. Box 750 561, 28725 Bremen, Germany*

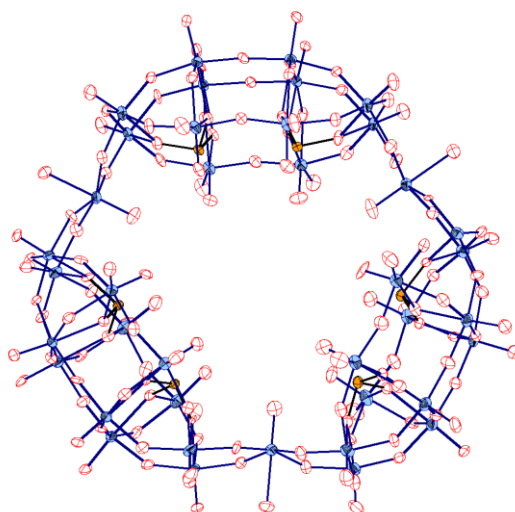

**Figure S1.** Thermal ellipsoid representation of  $[(\text{Se}_2\text{W}_{12}\text{O}_{46}(\text{WO}(\text{H}_2\text{O}))_3)]^{24-}$  (**1**).

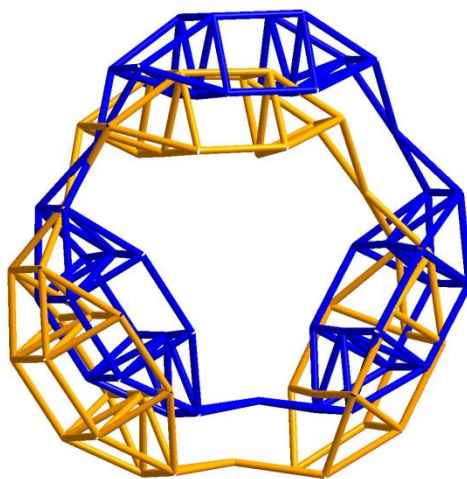

**Figure S2.** Solid state disorder model for the polyanions  $[(\text{Se}_2\text{W}_{12}\text{O}_{46}(\text{WO}(\text{H}_2\text{O}))_3)]^{24-}$  (**1**) in **Na1**, showing only the heavy atoms W and Se.

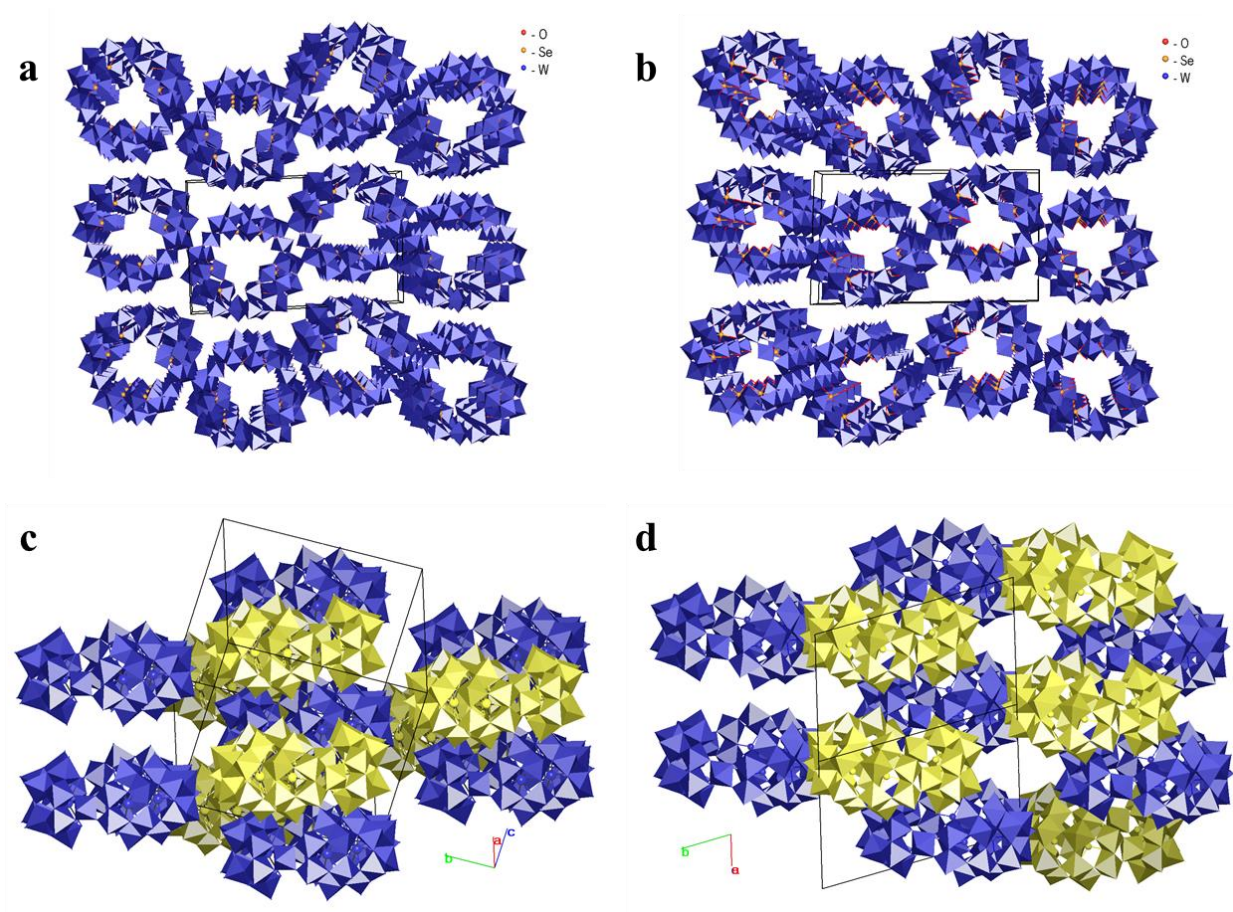

**Figure S3.** Crystal packing of the polyanions in **Na1** (a) and **KNa1** (b); and the hcp packing of the polyanions in **Na1** (c) and bcc in **KNa1** (d). Polyhedral view; different hexagonal layers are highlighted by blue and yellow, respectively.

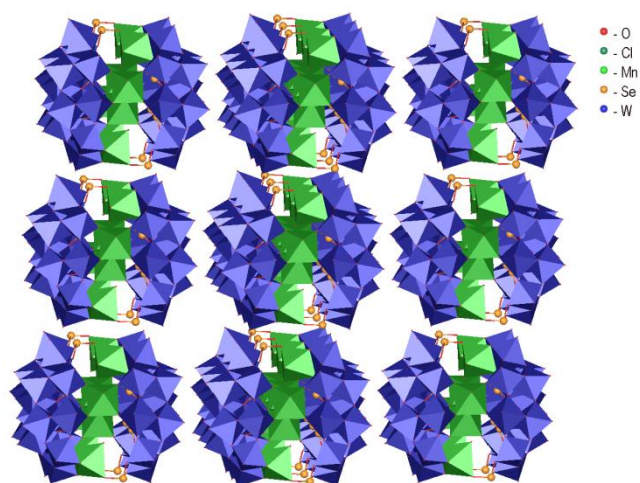

**Figure S4.** Crystal packing of the polyanions in **Na2'**. Blue and green octahedra correspond to  $\text{WO}_6$  and  $\text{MnL}_6$ , respectively.

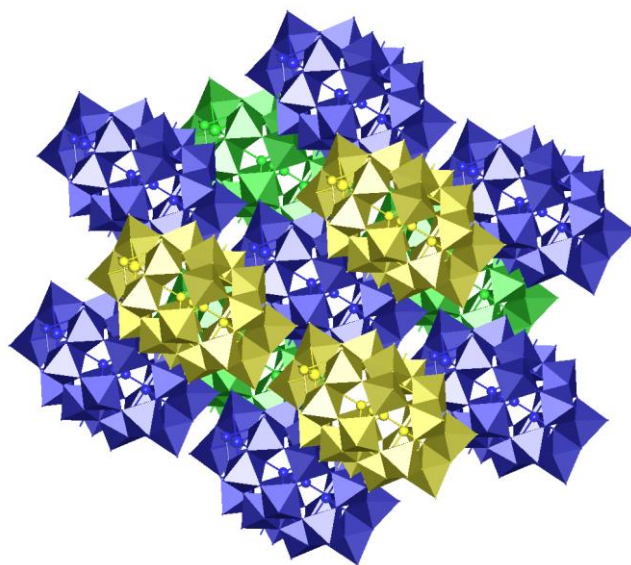

**Figure S5.** The distorted, three-layered, face-centered cubic (fcc) packing of the polyanion  $[(\text{Se}_2\text{W}_{12}\text{O}_{46})_2\{\text{Mn}_2\text{Cl}(\text{H}_2\text{O})_2\}\{\text{Mn}(\text{H}_2\text{O})_2\}_2(\text{SeO})_2]^{13-}$  (**2**) in **Na2** (polyhedral view). The three layers are highlighted in yellow, blue, and green.

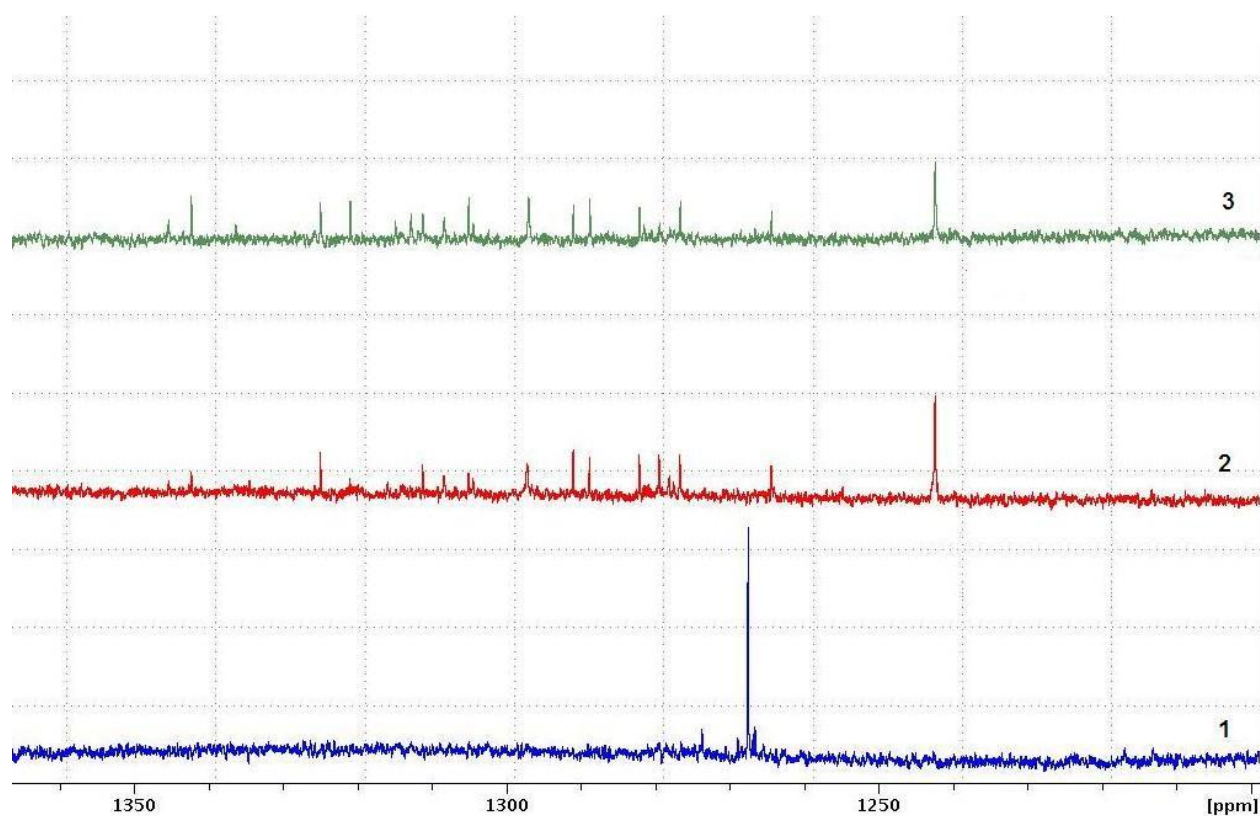

**Figure S6.**  $^{77}\text{Se}$  NMR of  $\text{Na}_{24}[\text{H}_6\text{Se}_6\text{W}_{39}\text{O}_{144}] \cdot 74\text{H}_2\text{O}$  (**Na1**) dissolved in  $\text{D}_2\text{O}$  using a 5 mm tube: 1 - spectrum recorded immediately after dissolution; 2 - spectrum recorded 4 h after dissolution; 3 - spectrum recorded 16 h after dissolution.

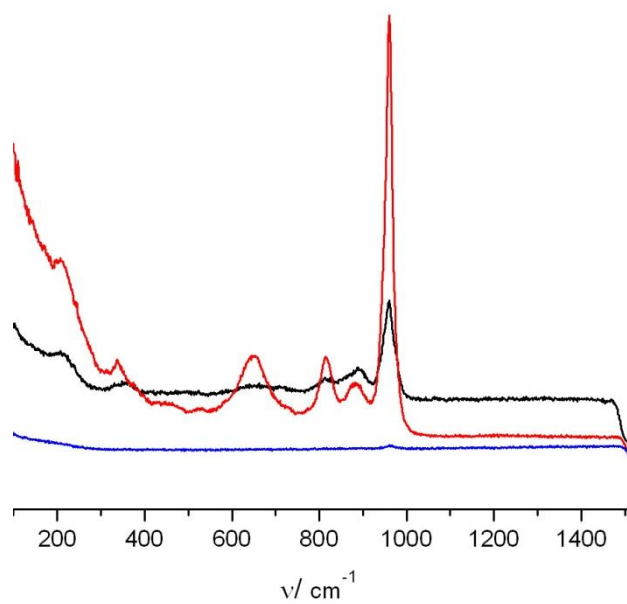

**Figure S7.** Raman spectra of **Na1**: reaction mixture (black), dry **Na1** (red), and aqueous solution of **Na1** (blue).

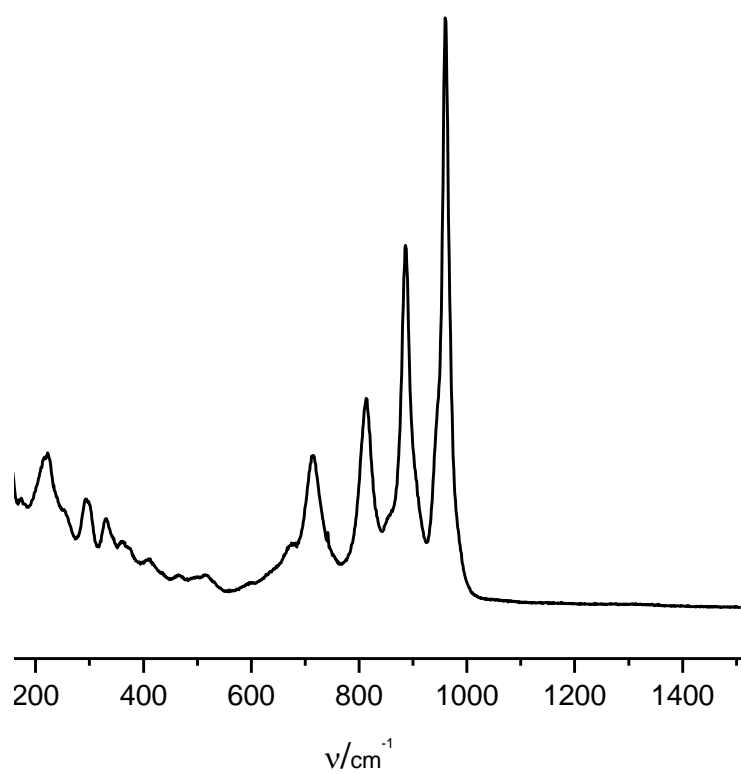

**Figure S8.** Raman spectrum of **Na<sub>2</sub>**.

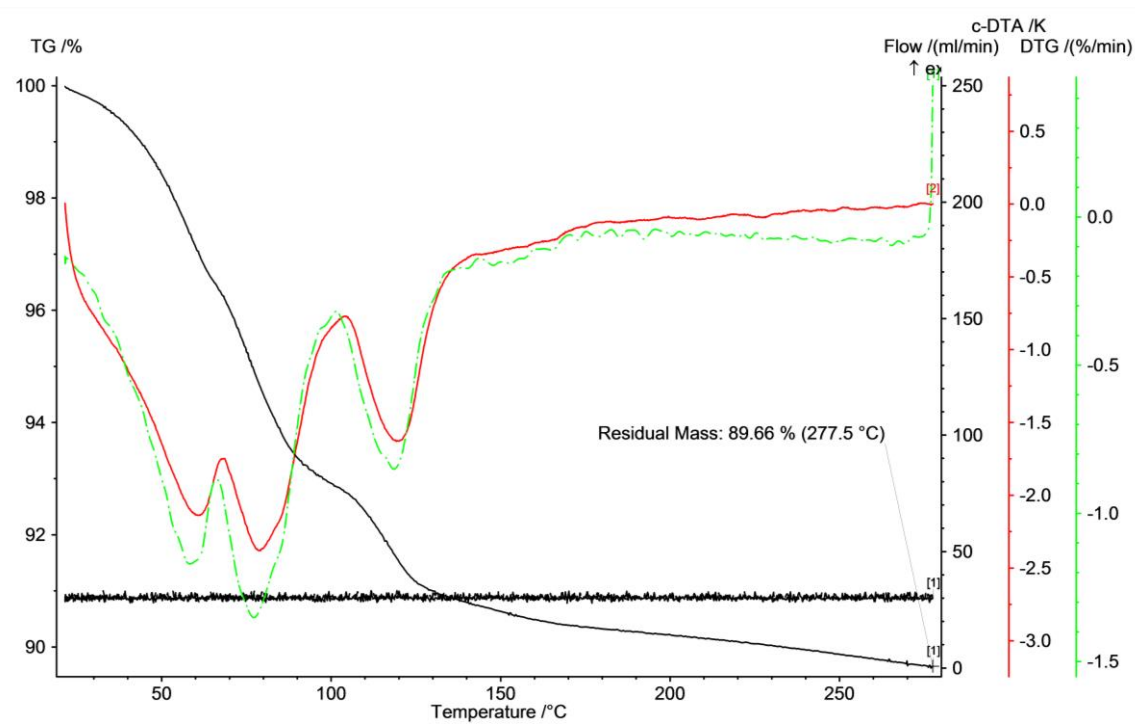

**Figure S9.** Thermogram of Na1.

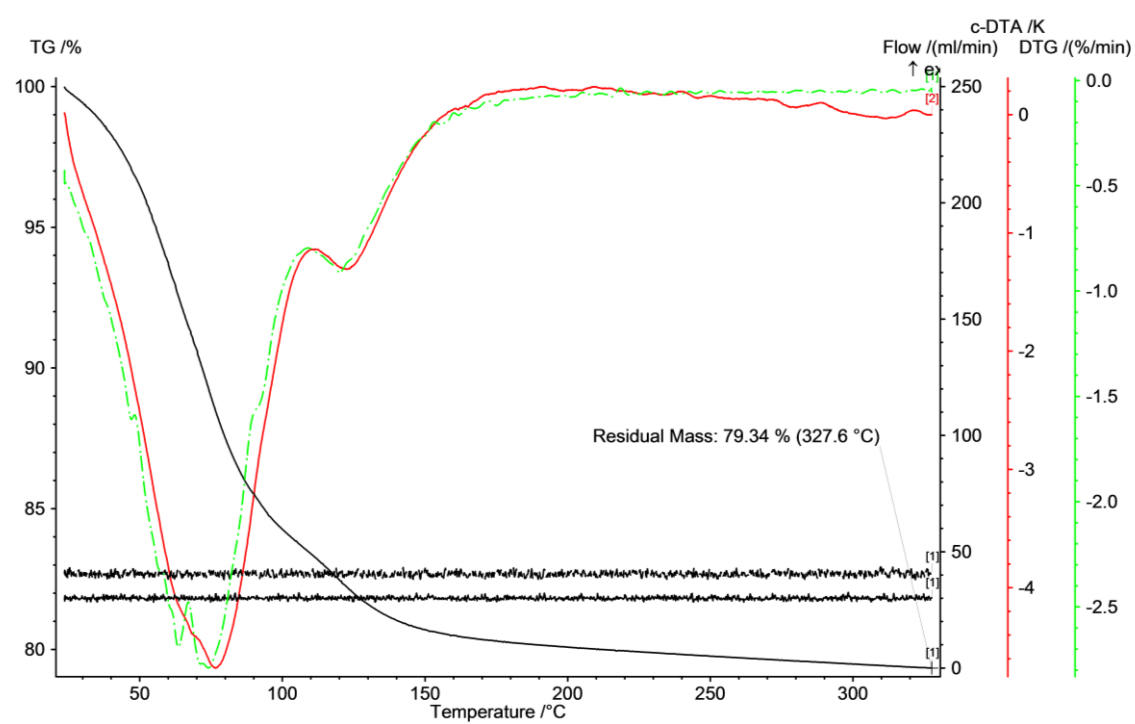

**Figure S10.** Thermogram of Na<sub>2</sub>.
